# Supplementary material
Source: ML conference proceedings conference paper supplement (https://openreview.net/forum?id=2uDOjKQG85)
Supplement: supplementary_material [file attachment]

# Seahorse Tail-inspired Soft Pneumatic Actuator Utilizing Dual-mode Actuation

Dickson Chiu Yu Wong, Zijian Zhou, Garmisch Lai Yin Wong, and Rob B.N. Scharff

## Key Features

- Inspired by the structure of the **seahorse tail**
- A **3D-printed** soft pneumatic pre-curved actuator
- With **dual actuation mode**, which straightens under negative pressure and further rolls under positive pressure
- Generates a maximum force of **23N** and **79N** under atmospheric and positive pressure, respectively

## Design And Fabrication

- Base Shape: family of logarithmic spirals

$$r = ae^{b\theta}$$

- The pillow's width increases uniformly from  $x_{first}$  to  $x_{last}$ , based on the geometric sequence as follows:

$$q = \sqrt[n-1]{\frac{x_{last}}{x_{first}}}$$

- $x_{first}$ ,  $x_{last}$ : width/height of the first and last units
- $q$ : geometric ratio
- $n$ : the actuation unit number.

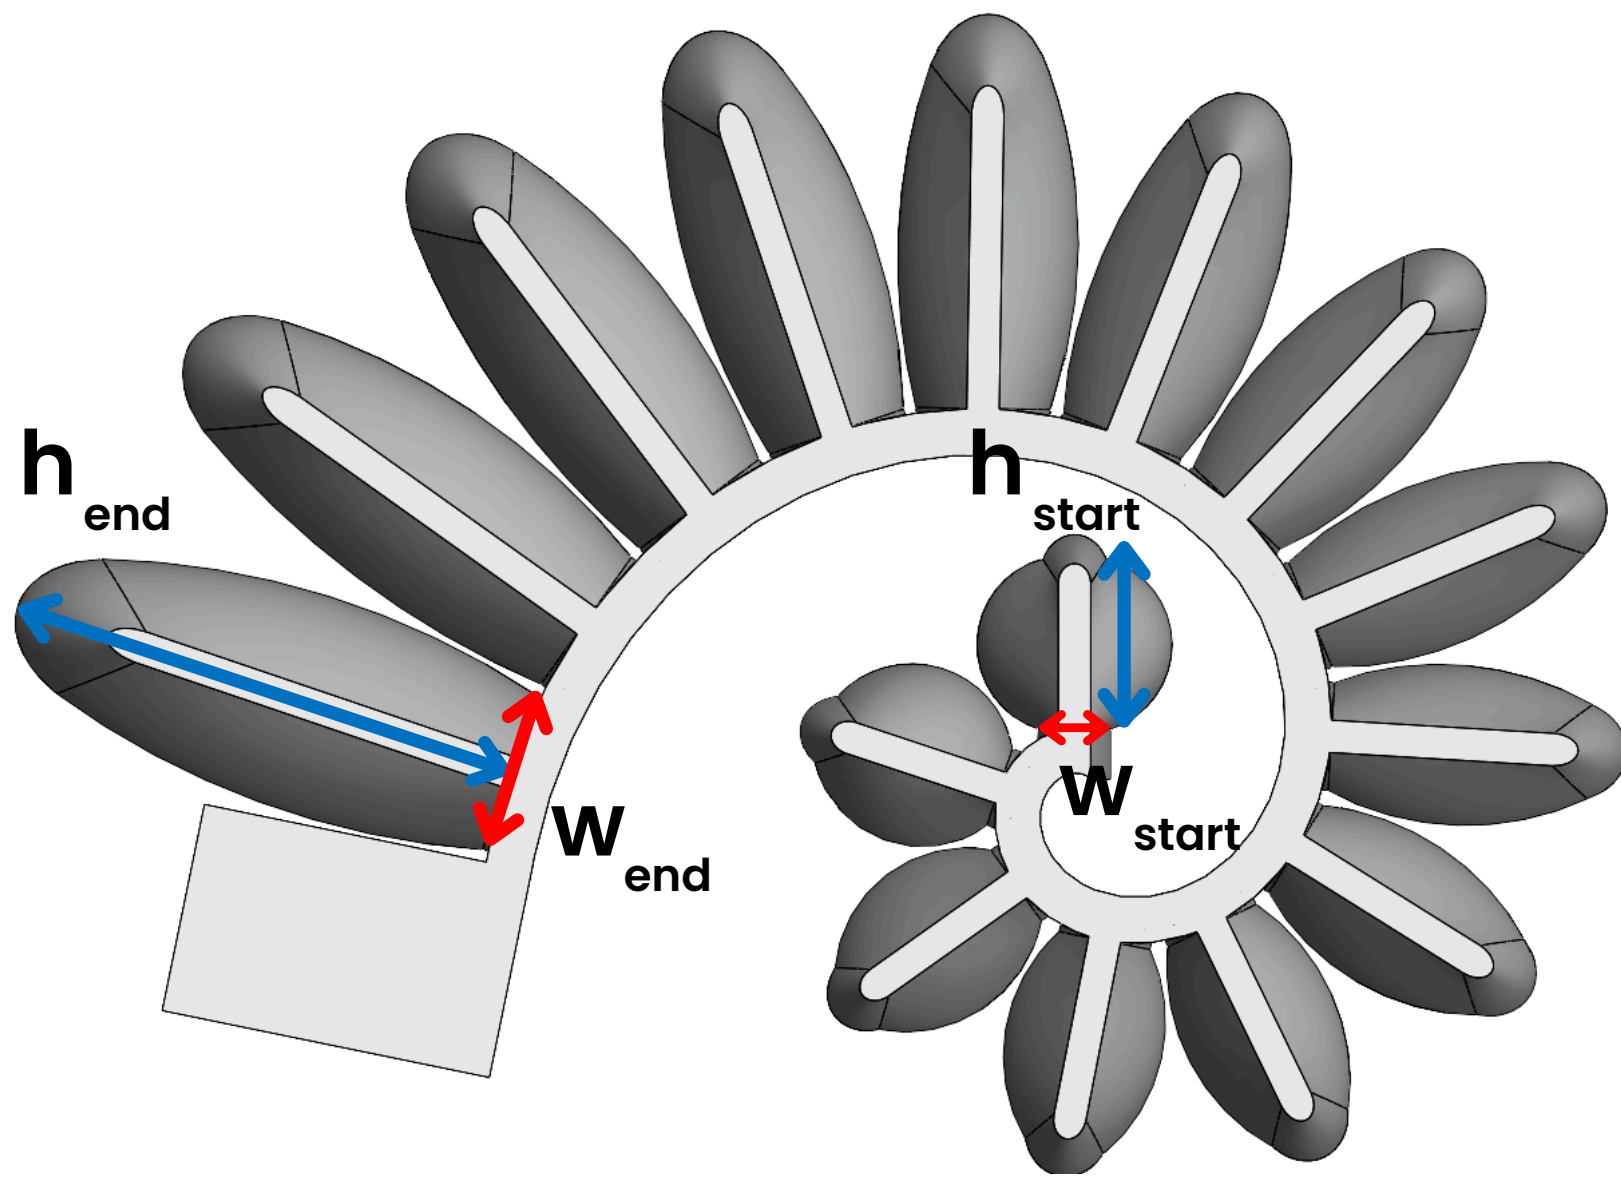

| Parameter   | Description                               |
|-------------|-------------------------------------------|
| $w_{start}$ | First segment arc length.                 |
| $w_{end}$   | Last segment arc length.                  |
| $h_{start}$ | First pillow height.                      |
| $h_{end}$   | Last pillow height.                       |
| $n$         | Number of segments.                       |
| $g_w$       | Geometric ratio for the width increment.  |
| $g_h$       | Geometric ratio for the height increment. |

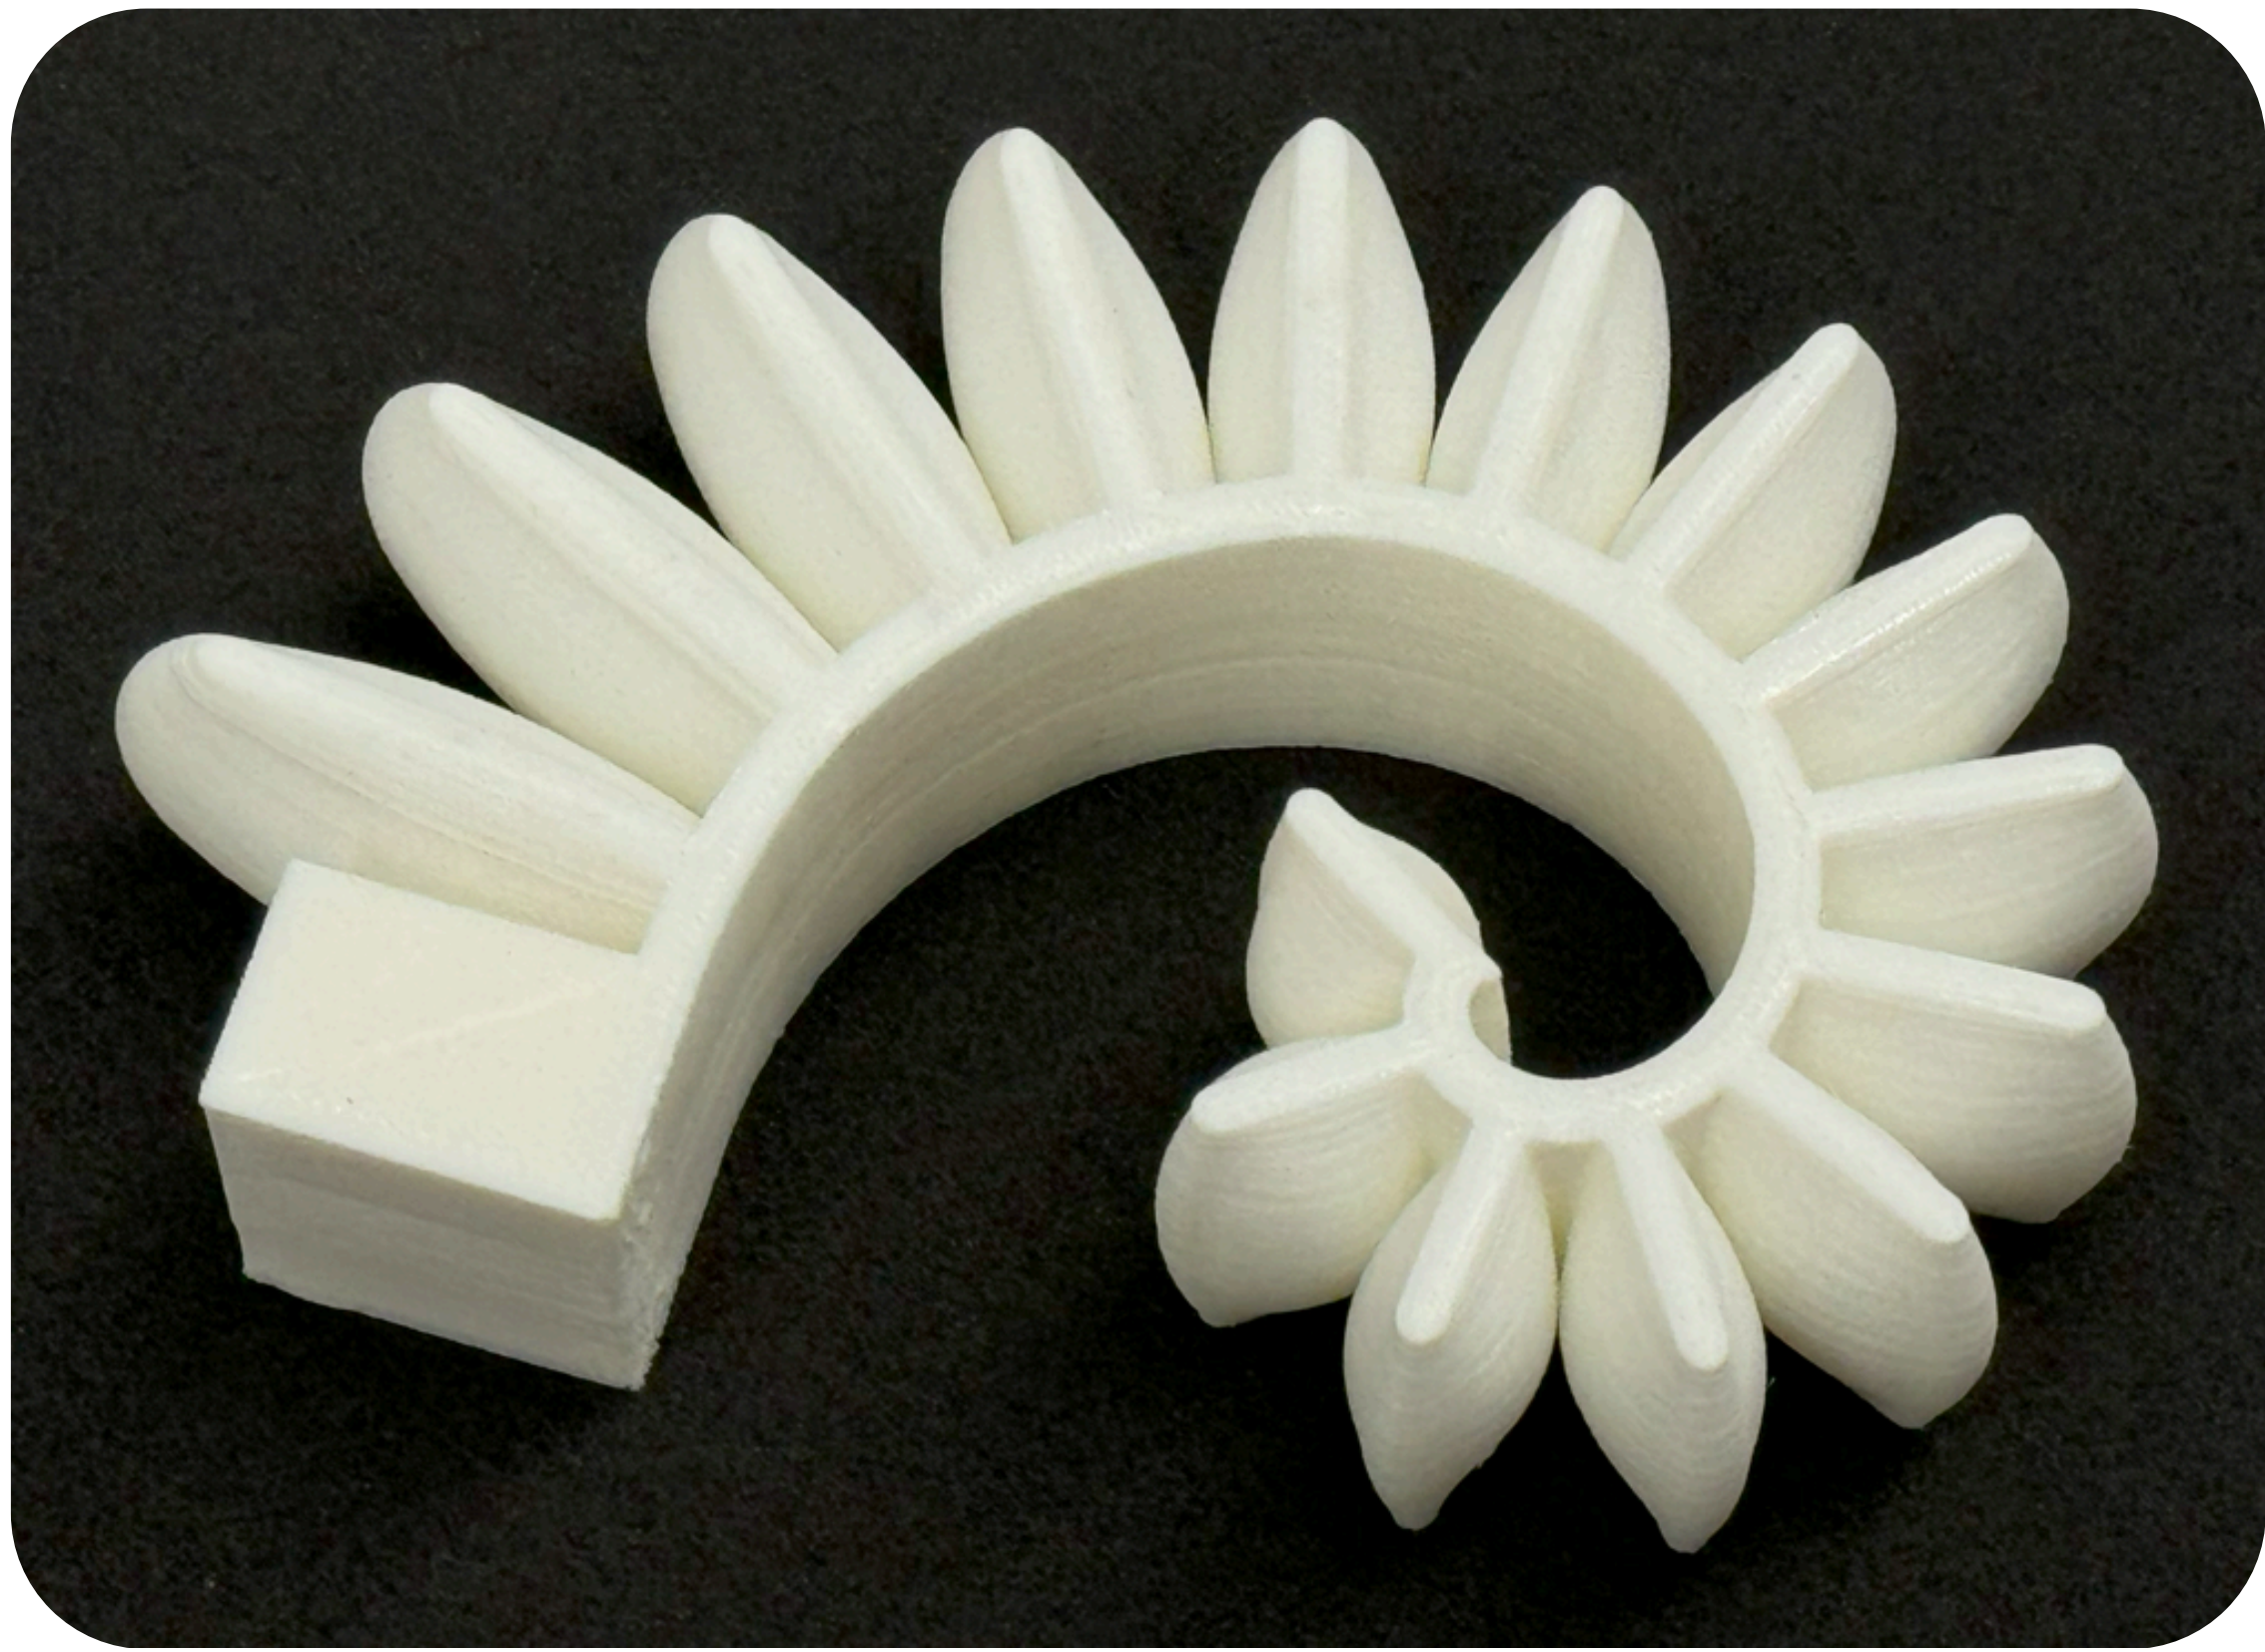

## Testing and Results

### Actuation Performance Test

#### Atmospheric Pressure

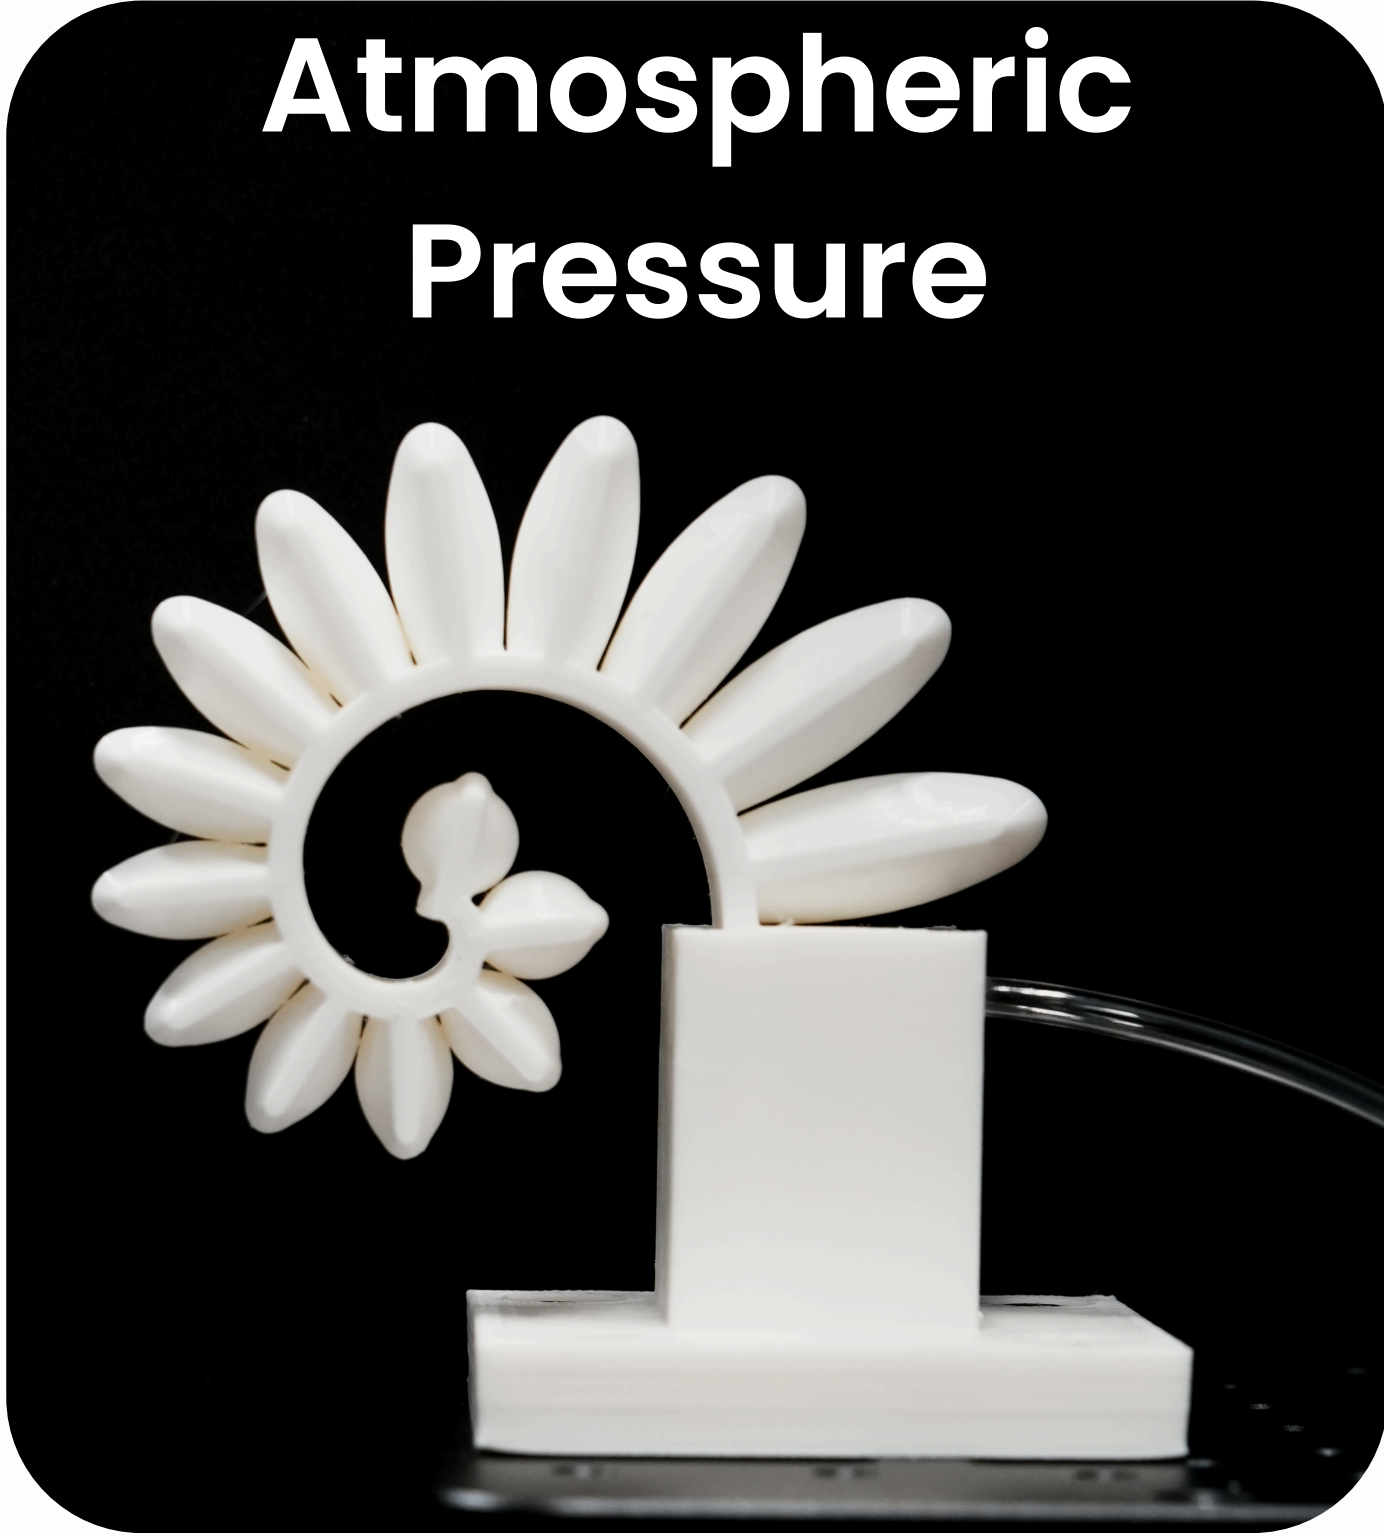

-50kPa

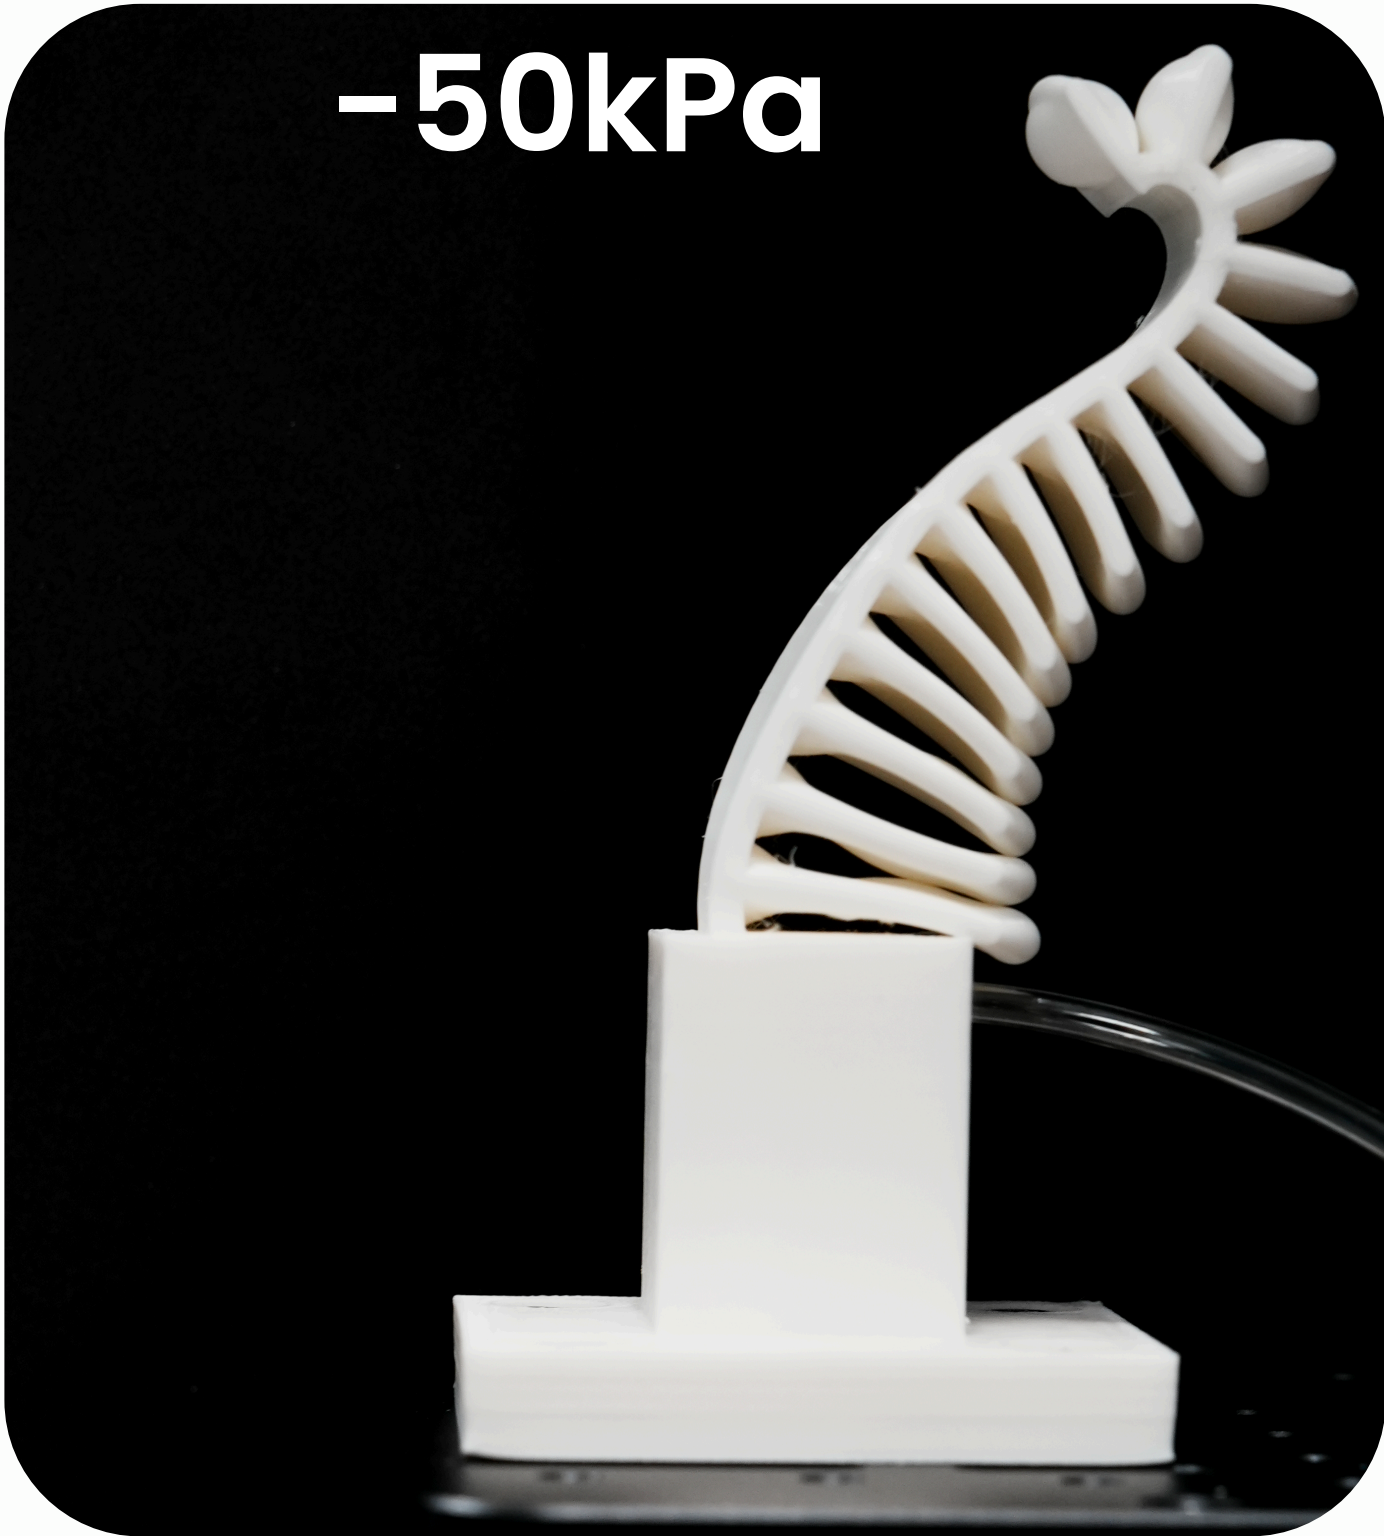

100kPa

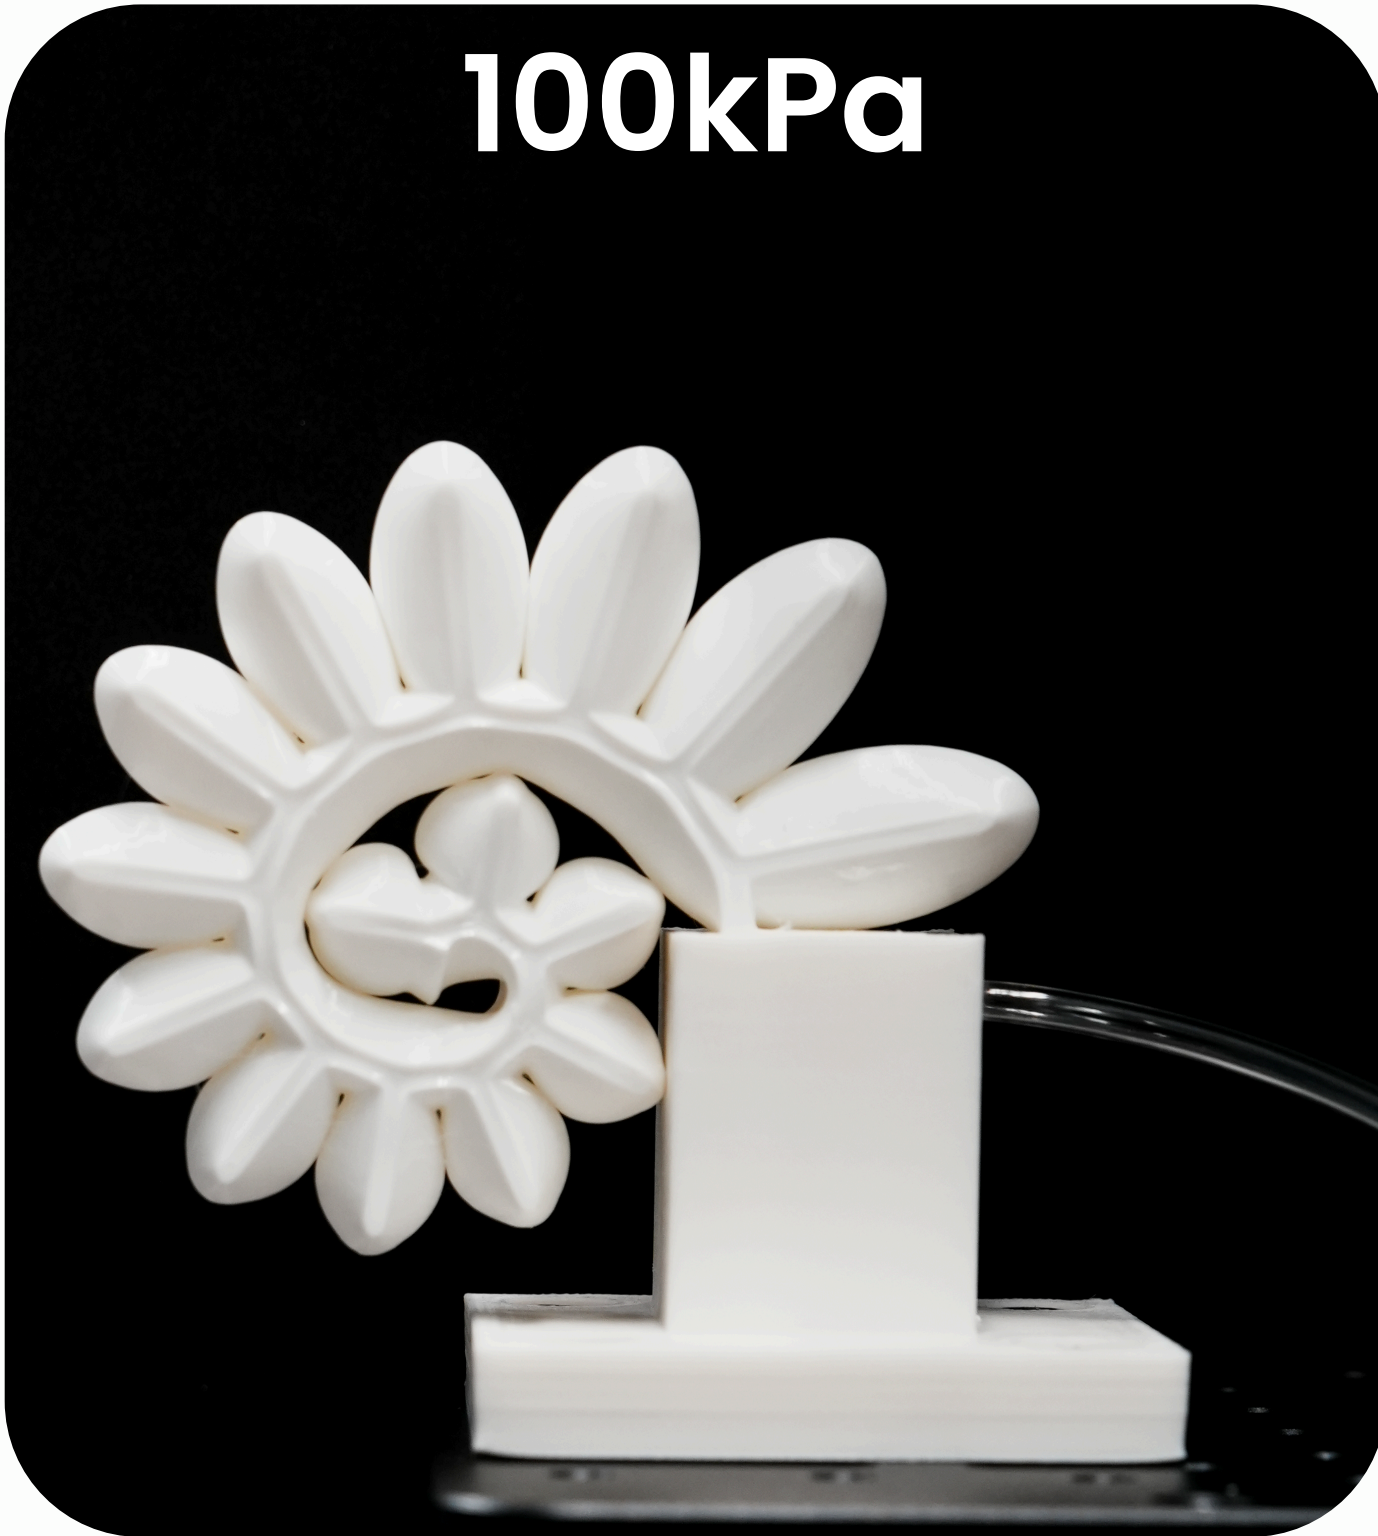

### Holding Force Test

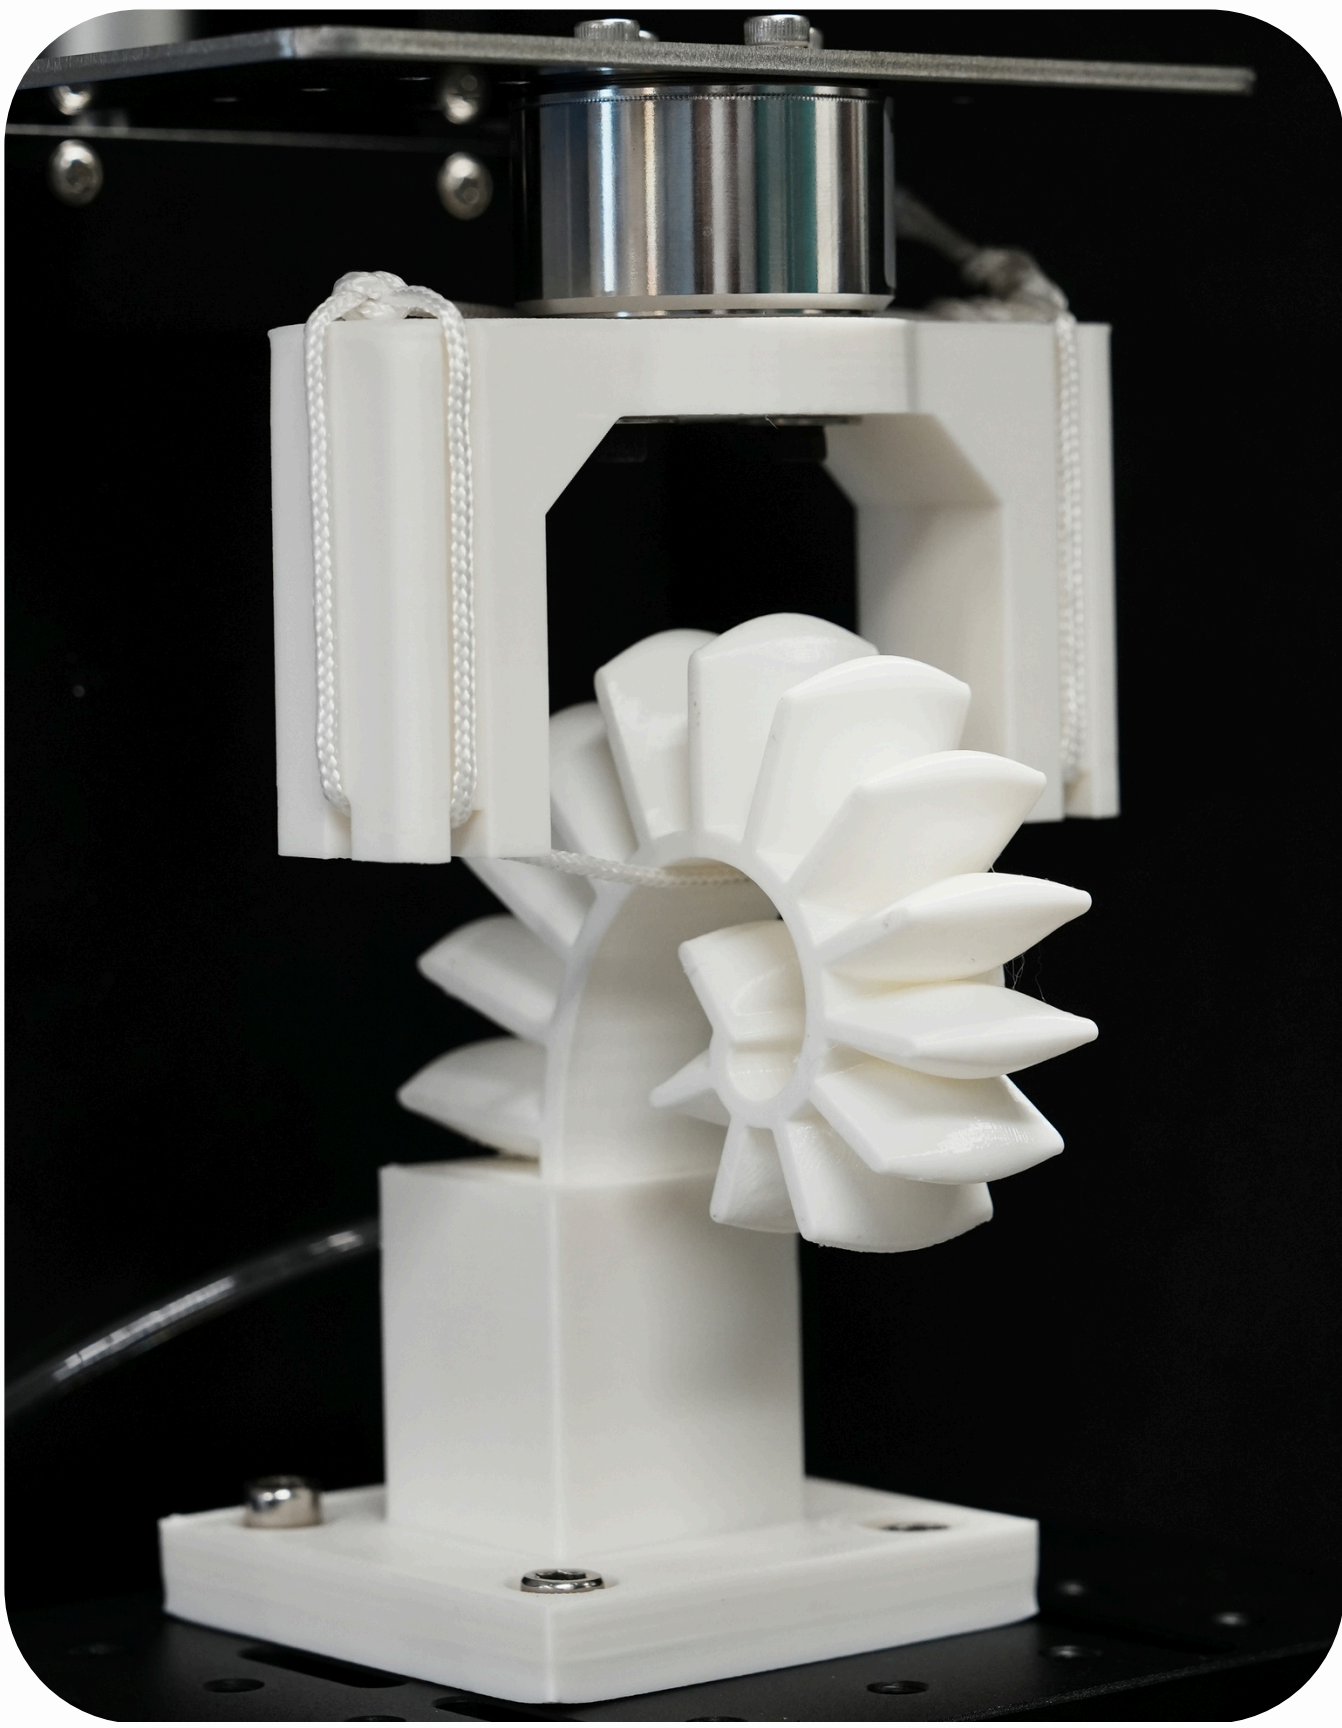

- Actuator Pressure: 100 kPa
- Speed: 8mm/s
- Inextensible String Diameter: 3mm

#### Force Generation

- Atmospheric pressure: 23N
- 100kPa: 79N

## Summary

### Dual-mode actuation capability:

- Straighten under negative pressure
- Further curl under positive pressure
- Provides a versatile range of movements

### Material composition and 3D printing fabrication method allow for holding force generation:

- Maximum passive holding force of **23N** under atmospheric pressure
- Maximum active holding force of **79N** under positive pressure
- Passive holding force utilizing material strength

**Superior force generation capabilities, ease of fabrication, and versatile actuation mechanisms make it a promising solution for various grasping and anchoring applications.**
